# Supplementary material for: A template-confined fabrication of controllable gold nanoparticles based on the two-dimensional nanostructure of macrocycles
Source: Royal Society of Chemistry journal article supplement (doi:10.1039/c5cc01032b), 2015-01-01
Supplement: c5cc01032b1.pdf [file c5cc01032b1.pdf]

# **Template-confined fabrication of controllable gold nanoparticles based on two-dimensional nanostructure of macrocycle**

*Yanfang Geng,<sup>a</sup> Miaoqing Liu,<sup>b</sup> Jindong Xue,<sup>a</sup> Peng Xu,<sup>a</sup> Yifei Wang,<sup>b</sup> Lijin Shu,<sup>b,\*</sup>*

*Qingdao Zeng,<sup>a,\*</sup> and Chen Wang<sup>a,\*</sup>*

<sup>a</sup> CAS Key Laboratory of Standardization and Measurement for Nanotechnology, National Center for Nanoscience and Technology, No. 11 Beiyitiao, Zhongguancun, Beijing 100190, P. R. China

<sup>b</sup> Key laboratory of Organosilicon Chemistry and Material Technology of Ministry of Education, Hangzhou Normal University, Hangzhou 310012, P. R. China

\*Corresponding authors.

E-mail: [zengqd@nanoctr.cn](mailto:zengqd@nanoctr.cn), [wangch@nanoctr.cn](mailto:wangch@nanoctr.cn), [shulj@hznu.edu.cn](mailto:shulj@hznu.edu.cn)

## 1. Materials and Measurements

**Materials.**  $\text{HAuCl}_4$  and  $\text{NaBH}_4$  were purchased from Sigma-Aldrich Co. LLC., and the solvents were obtained from Beijing Chemical Reagents Co. and dried using standard methods. The chemicals involved in our experiments were of analytical grade and used without further purification. The assemblies were formed on freshly cleaned HOPG (grade ZYB, Russia) surface. Compound **1** was prepared according to literature methods [*Chem. Commun.*, 2014, 50, 9369-9371]. All reactions were carried out under nitrogen atmosphere unless otherwise noted.

**Measurements.**  $^1\text{H}$  and  $^{13}\text{C}$  NMR were performed on Bruker AV-400 spectrometer with residual solvent peaks ( $\text{CDCl}_3$ :  $^1\text{H}$ :  $\delta = 7.26$ ,  $^{13}\text{C}$ :  $\delta = 77.23$ ). Maldi-TOF MS were obtained on a PerSeptive Biosystem Voyager-DE STR. STM measurements were performed on Nanoscope III (Veeco Metrology, USA) with mechanically formed Pt/Ir (80/20) tips. All images were recorded in constant current mode, and the tunnelling conditions are given in the corresponding figures captions. XPS measurements were conducted on ESCALAB250Xi spectrometer equipped with Mg  $K\alpha$  (1253.6 eV) source.

## 2. Synthesis of macrocycle **6Y**

The synthesis of macrocycles **6Y** was outlined in Scheme 1. Starting with the single protected compound **1**, homocoupling of **1** under Pd/Cu catalyzed variation of the oxidative acetylene coupling furnished **2** in 98.8% yield. Complete deprotection of the Tips group with TBAF in THF provided **3** in 98% yield. Homocoupling of **3** under Pd/Cu catalyzed variation under diluted concentration in THF furnished macrocycle

**6Y** as a brown solid in 10% yield after CC and size exclusion Chromatography (SEC).

All the compounds were characterized by  $^1\text{H}$  NMR,  $^{13}\text{C}$  NMR, MALDI-TOF and HR MALDI-TOF mass spectrometers.

**Scheme 1.** Schematically synthetic route of macrocycle **6Y**

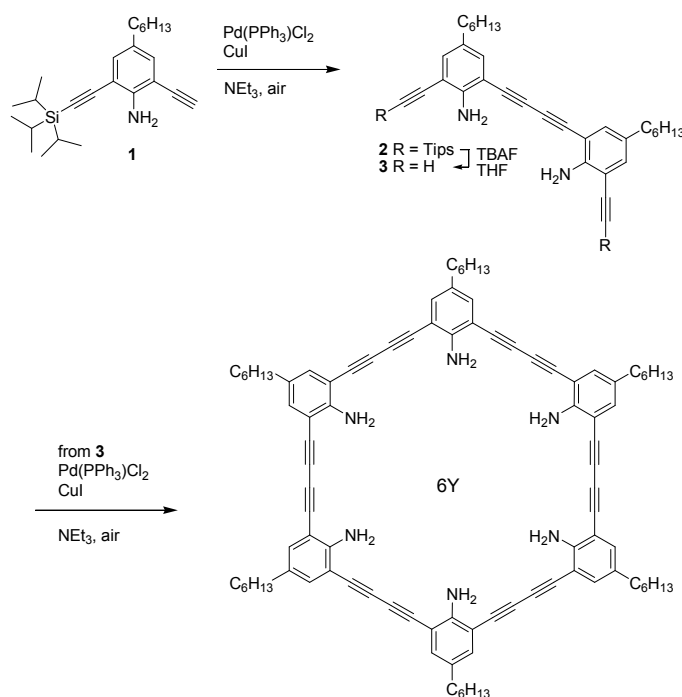

## 2.1 Synthesis of 6,6'-(buta-1,3-diyne-1,4-diyl)bis(4-hexyl-2-((triisopropylsilyl)ethynyl)aniline) (**2**)

A three-necked flask was charged with **1** (2.9 g, 7.6 mmol), THF (15 ml), diisopropyl ethyl amine (2.9 g, 22.44 mmol),  $\text{Pd}(\text{PPh}_3)_2\text{Cl}_2$  (0.16 g, 0.228 mmol), and CuI (0.073 g, 0.38 mmol). After the reaction mixture was stirred for 1 h under air, the resulted residue was absorbed on silica gel and purified by column chromatography (CC) (hexane/ethyl acetate (200:1/v:v) as eluent) to yield **2** (2.86 g, 3.76 mmol) as a yellow oil in 98.8% yield.  $^1\text{H}$  NMR (400 MHz,  $\text{CDCl}_3$ )  $\delta$  (ppm): 7.16 (s, 2H), 7.15 (s, 2H), 4.83 (s, 4H), 2.45 (t,  $J = 7.6$  Hz, 4H), 1.54 (m, 4 H), 1.31 (s, 12

H), 1.16 (s, 42H), 0.91 (t, J = 6.6 Hz, 6 H).  $^{13}\text{C}$  NMR (100 MHz,  $\text{CDCl}_3$ )  $\delta$  (ppm) 149.16, 133.53, 133.01, 131.66, 108.04, 105.61, 103.10, 96.58, 79.70, 78.92, 77.36, 77.04, 76.72, 34.67, 31.73, 31.42, 28.84, 22.63, 18.74, 14.11, 11.30. MALDI-TOF MS:  $m/z$ ;  $[\text{M}]^+$ , calcd for  $\text{C}_{50}\text{H}_{76}\text{N}_2\text{Si}_2$ : 761.32; found: 761.8.

## 2.2 Synthesis of 6,6'-(buta-1,3-diyne-1,4-diyl)bis(2-ethynyl-4-hexylaniline) (3)

To a stirred solution of **2** (1.9 g, 2.495 mmol) in THF (20 ml) was added a solution of TBAF (0.044 g, 0.14 mmol) in THF (2 ml). The mixture was stirred for 30 minutes under air. After removal of the solvent, the residue was chromatographed (silica gel, hexane/ethyl acetate (40:1/v:v) ) to furnish **3** (1.08 g, 2.44 mmol) as a yellow oil in 98% yield.  $^1\text{H}$  NMR (400 MHz,  $\text{CDCl}_3$ )  $\delta$  7.16 (s, 4H), 4.78 (s, 4H), 3.40 (s, 2H), 2.42 (t, J = 7.3 Hz, 4H), 1.54 (s, 4H), 1.28 (s, 12H), 0.88 (s, 6H).  $^{13}\text{C}$  NMR (100 MHz,  $\text{CDCl}_3$ )  $\delta$  (ppm): 149.22, 133.95, 133.59, 131.76, 106.42, 105.76, 82.82, 80.07, 79.58, 78.97, 34.57, 31.69, 31.29, 28.74, 22.59, 14.09. MALDI-TOF MS:  $m/z$ ;  $[\text{M}]^+$ , calcd for  $\text{C}_{32}\text{H}_{36}\text{N}_2$ : 448.63; found: 448.53.

## 2.3 Synthesis of macrocycle 6Y

To a degassed solution of  $\text{Pd}(\text{PPh}_3)_2\text{Cl}_2$  (0.032 g, 0.0446 mmol) in dry THF (1400 ml),  $\text{CuI}$  (0.0187 g, 0.098 mmol), diisopropyl ethyl amine (1.0 g, 3.5 mmol), was dropped a solution of **3** (0.4 g, 0.892 mmol) in THF (500 mL) over 10 h. The reaction mixture was further stirred under air at rt. for 4 days. The resulted reaction mixture was absorbed on silica gel and purified by column chromatography (CC) (hexane/ethyl acetate (15:1/v:v) as eluent) and further subjected to Size exclusion chromatography (Bio-bead, toluene as eluent) to yield **6Y** (0.040 g, 0.0336 mmol) as

a yellow oil in 10% yield.  $^1\text{H}$  NMR (400 MHz,  $\text{CDCl}_3$ )  $\delta$  (ppm): 7.14 (s, 12H), 4.76 (s, 12H), 2.43 (t,  $J = 7.6$  Hz, 12H), 1.53 (m, 12H), 1.30 (s, 36H), 0.90 (t,  $J = 6.7$  Hz, 18H).  $^{13}\text{C}$  NMR (100 MHz,  $\text{CDCl}_3$ )  $\delta$  (ppm): 150.25, 133.75, 132.03, 106.05, 79.45, 79.23, 34.57, 31.68, 31.19, 28.76, 22.58, 14.08. MALDI-TOF HRMS:  $m/z$ ;  $[\text{M}+\text{H}]^+$ , calcd for  $\text{C}_{96}\text{H}_{103}\text{N}_6$ : 1339.8216; found:1339.8230.

### 3. Formation of AuNPs on Surface

**6Y** was dissolved in ethanol with the concentration less than  $10^{-4}$  M, and then a droplet of solution was deposited onto freshly cleaved HOPG surface. After evaporation of solvent, the STM images were recorded at the surface. A drop of  $\text{HAuCl}_4$  (1  $\mu\text{L}$ ,  $10^{-3}$  g/L) was added onto the HOPG surface when the assembled structure of **6Y** was obtained. After standing for 15 minutes, the reacted samples were repeatedly washed with ethanol/water mixed solution for several times. And then, 0.4  $\mu\text{L}$  of  $\text{NaBH}_4$  with concentration of  $10^{-3}$  g/L was added onto the surface. The STM measurement was conducted again after washing the surface for several times following the same procedure as mentioned above.

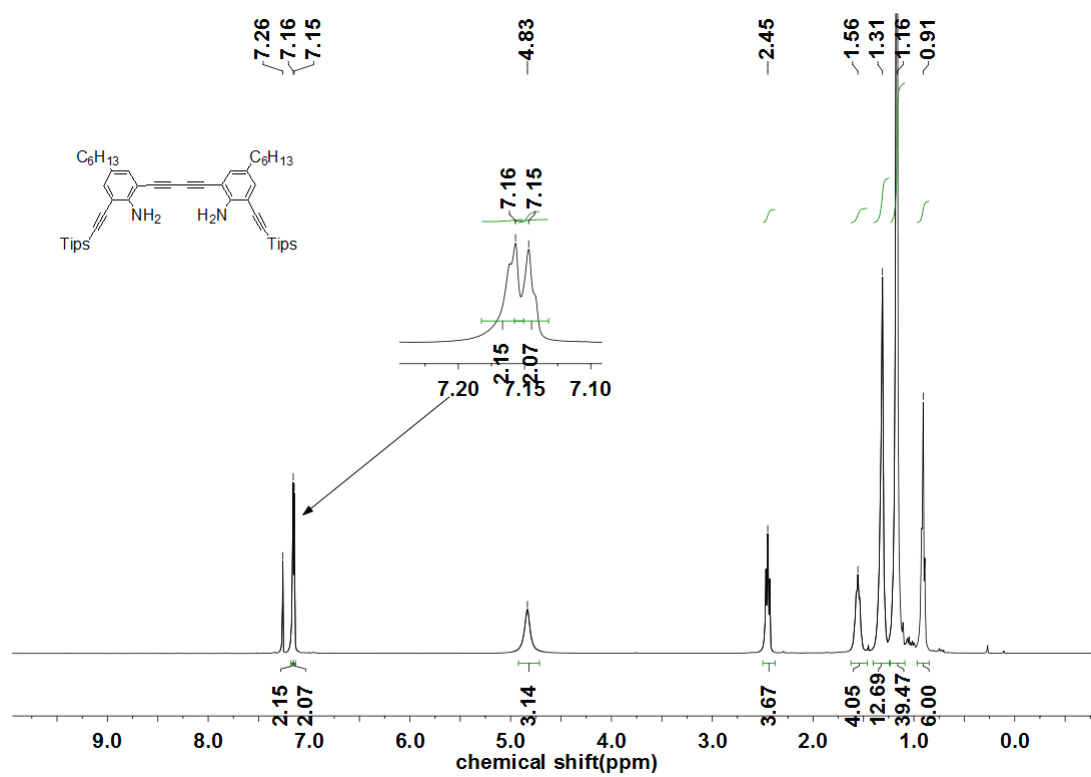

**Figure S1.** <sup>1</sup>H NMR of compound 2.

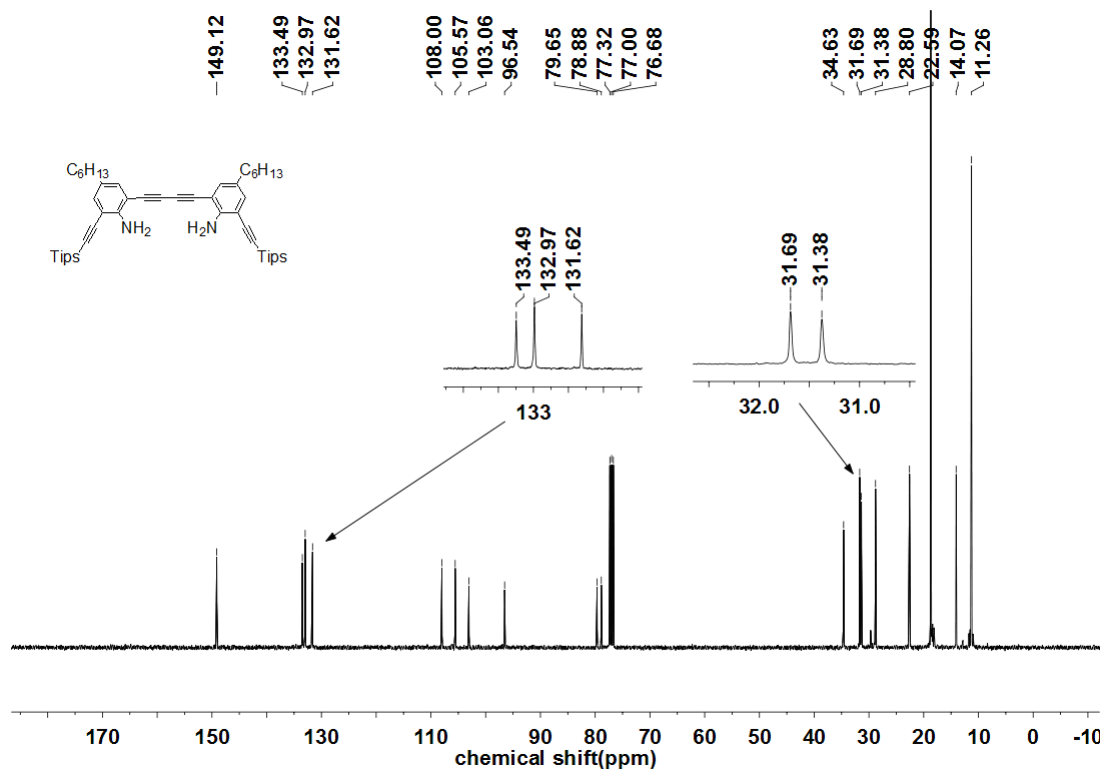

**Figure S2.**  $^{13}\text{C}$  NMR of compound **2**.

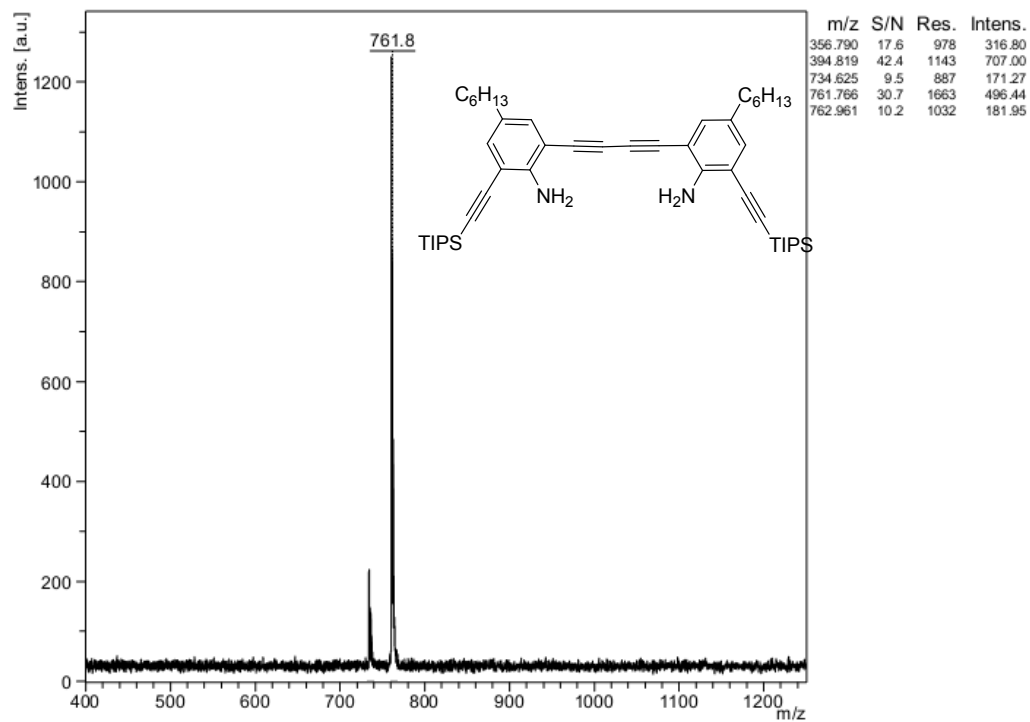

**Figure S3.** MALDI-TOF of compound **2**.

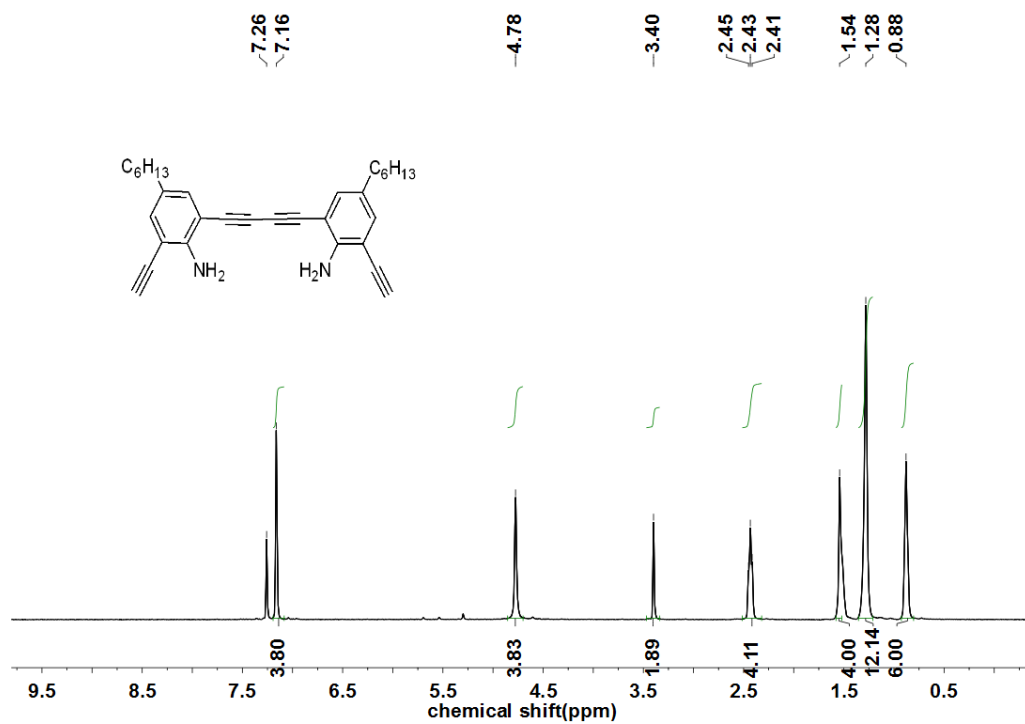

Figure S4. <sup>1</sup>H NMR of compound 3.

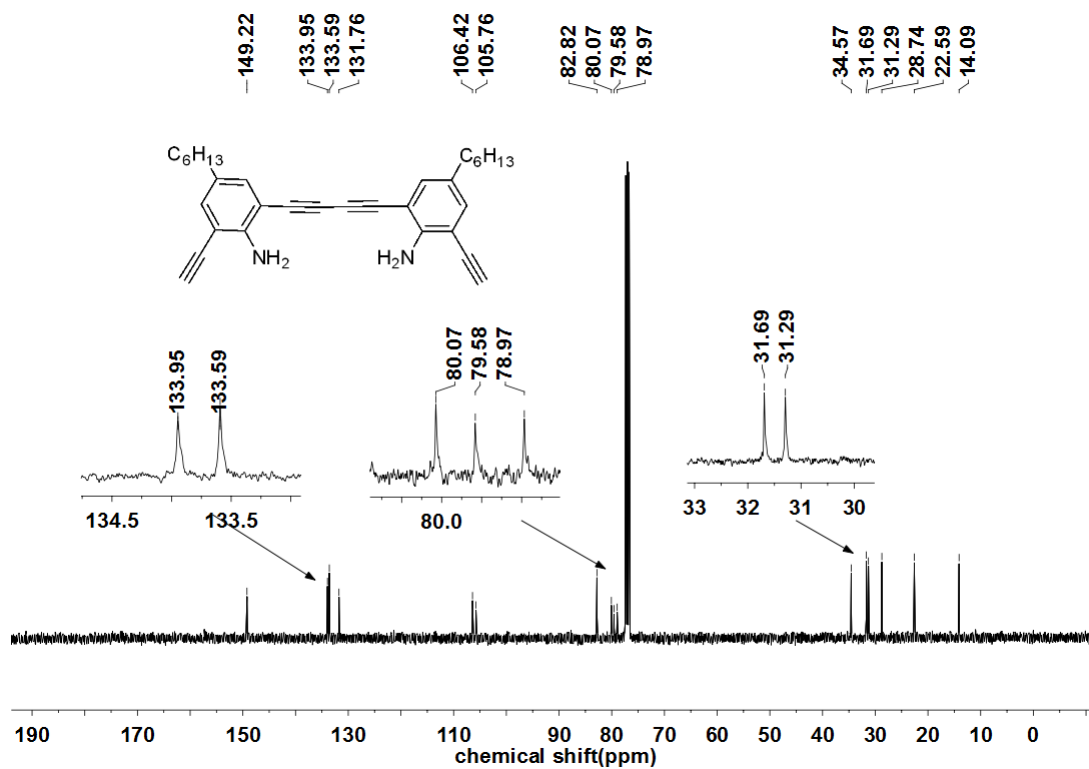

Figure S5. <sup>13</sup>C NMR of compound 3.

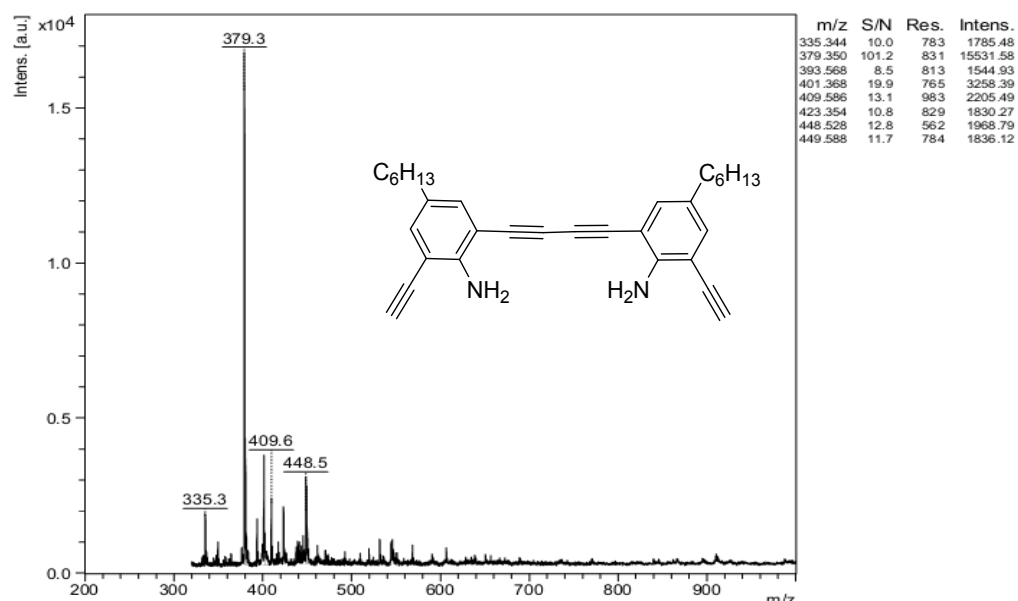

**Figure S6.** MOLDI-TOF of compound **3**.

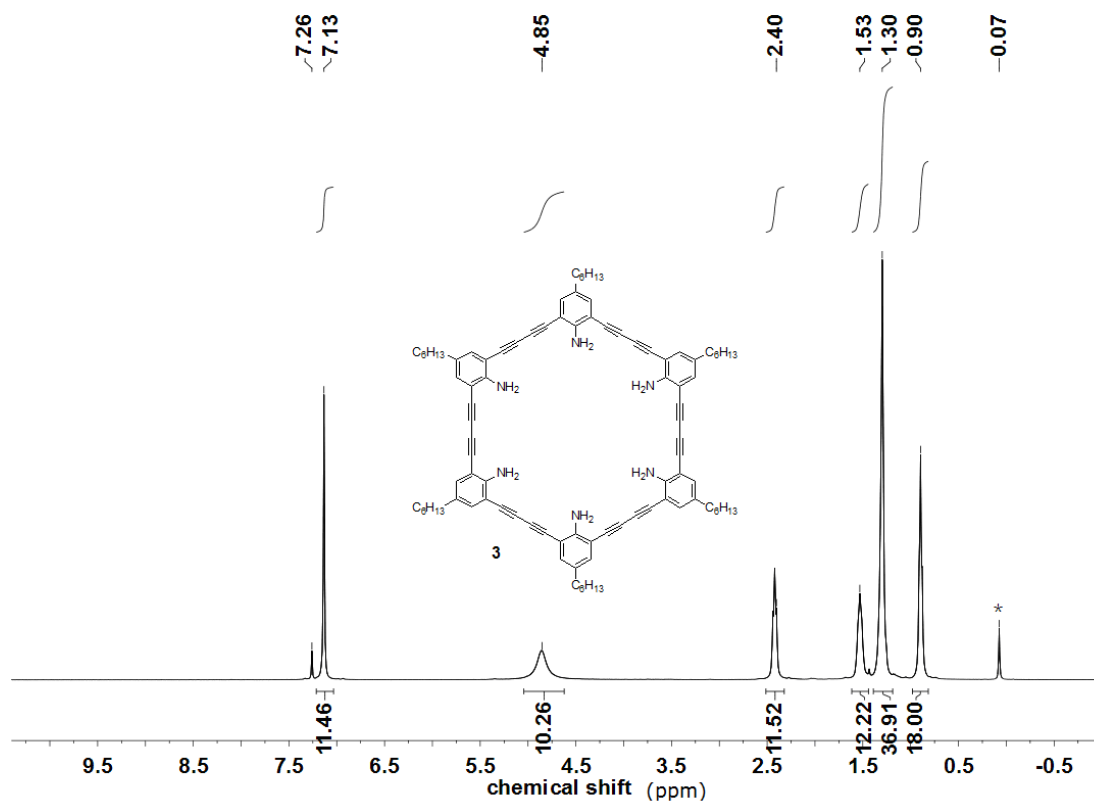

**Figure S7.**  $^1\text{H}$  NMR of **6Y** (Peak with \* label is from the proton resonance of grease).

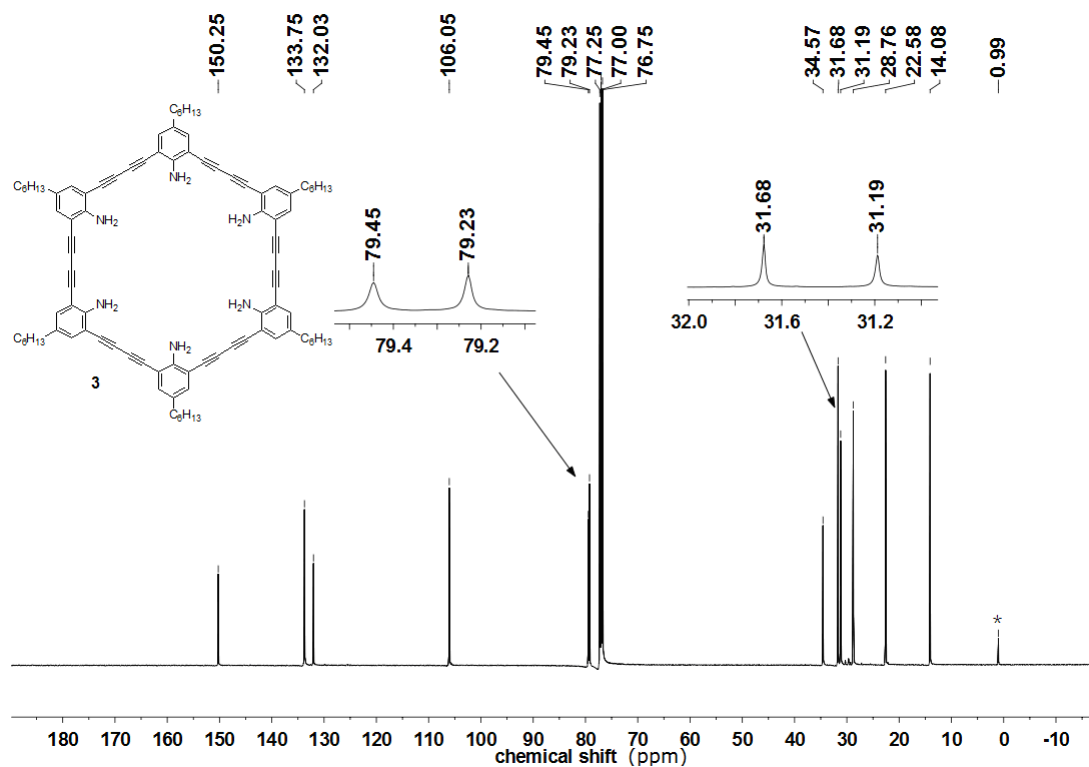

**Figure S8.**  $^{13}\text{C}$  NMR of **6Y** (Peak with \* label is from the carbon resonance of grease).

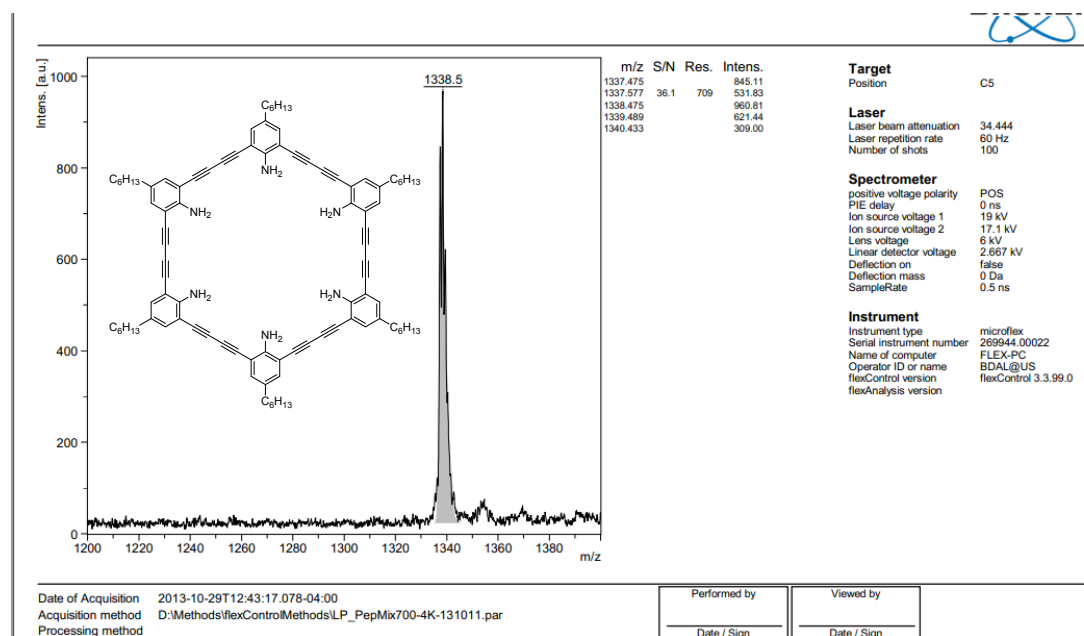

**Figure S9.** MOLDI-TOF spectrum of **6Y**

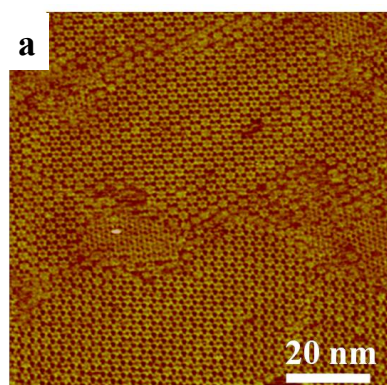

**Figure S10.** Large-scale STM images of 6Y on HOPG surface. Imaging conditions:  $I_{set} = 400$  pA,  $V_{bias} = 460$  mV.

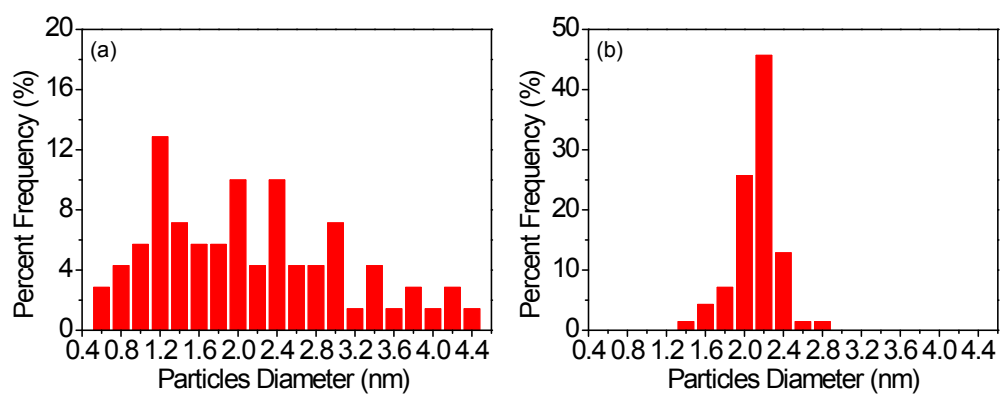

**Figure S11.** AuPNs size distribution before and after washing with ethanol/water mixed solution.

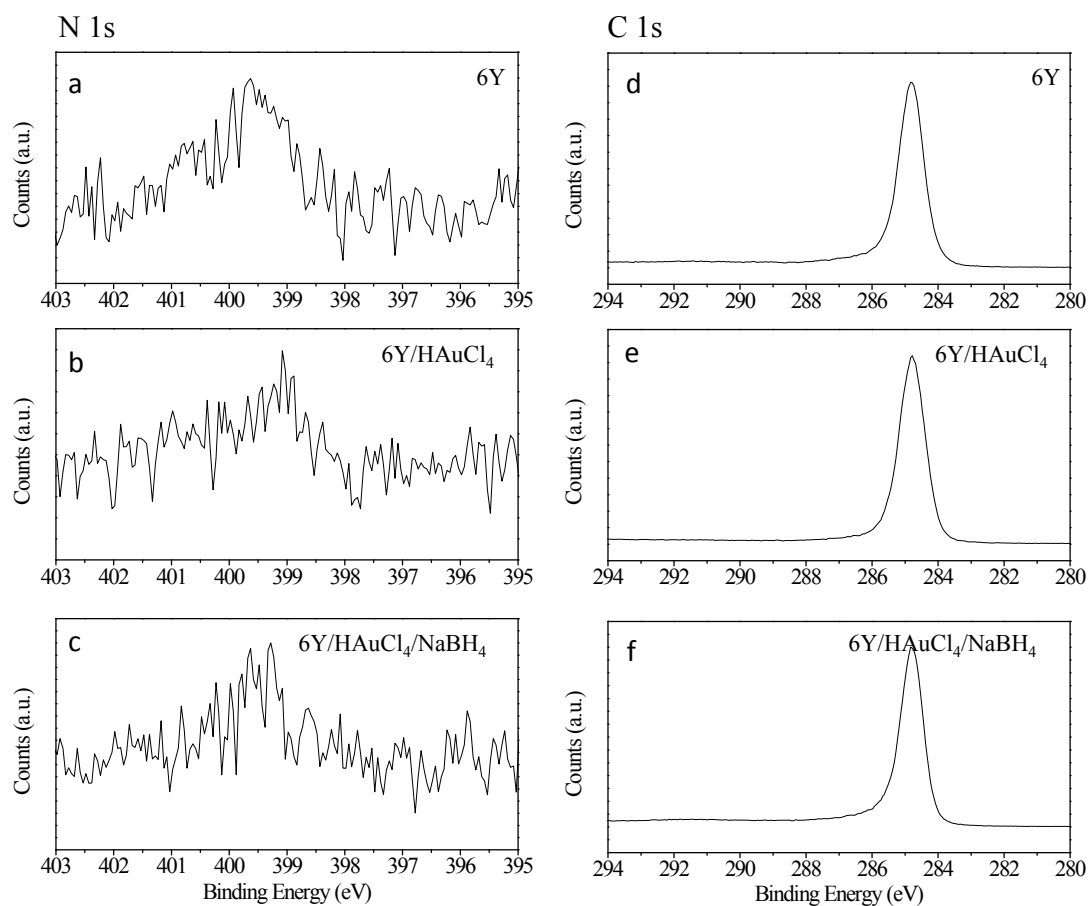

**Figure S12.** N 1s and C 1s regions of the XPS spectrum of **6Y**, **6Y/HAuCl<sub>4</sub>** and **6Y/HAuCl<sub>4</sub>/NaBH<sub>4</sub>** samples.
